# Supplementary material
Source: Research Square preprint supplement (doi:10.21203/rs.3.rs-10165873/v1)
Supplement: Supplementary file 1 [file 7a976e943d1ac3bd3950d108.docx]

**Additional file 1.** English version of the general practitioner satisfaction questionnaire

This questionnaire was specifically developed by the study investigators to assess general practitioners' satisfaction with the CAPA-CITY adapted physical activity program. It has not been previously validated or published.

Instructions

*Please indicate the response that best reflects your opinion for each of the following statements. A free-text section is provided at the end of the questionnaire for any additional comments regarding the program.*

1. How would you rate the procedures for identifying eligible patients and referring them to the CAPA-CITY program?

☐ Poor ☐ Fair ☐ Good ☐ Very good

2. How would you rate communication with the CAPA-CITY program team?

☐ Poor ☐ Fair ☐ Good ☐ Very good

3. How would you rate the benefits experienced by the patient(s) you referred to the program?

☐ No perceived benefit ☐ Limited benefit ☐ High benefit ☐ Very high benefit

4. Overall, how would you rate the contribution of the CAPA-CITY adapted physical activity program to the management of patients with chronic conditions?

☐ Poor ☐ Fair ☐ Good ☐ Very good

5. Would you refer eligible patients with chronic conditions to the CAPA-CITY adapted physical activity program again in the future?

☐ Definitely not ☐ Possibly ☐ Very likely ☐ Definitely yes

6. Additional comments

Please use the space below to provide any comments or suggestions regarding the CAPA-CITY adapted physical activity program.
